# Supplementary material
Source: Springer Nature journal article supplement (https://www.springermedizin.de/resource/supplementary/12986_2010_277_MOESM5_ESM.pdf/25655740)

**5a**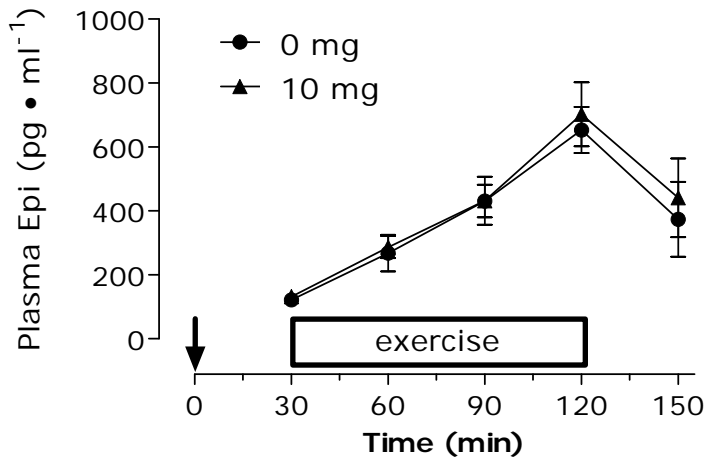**5b**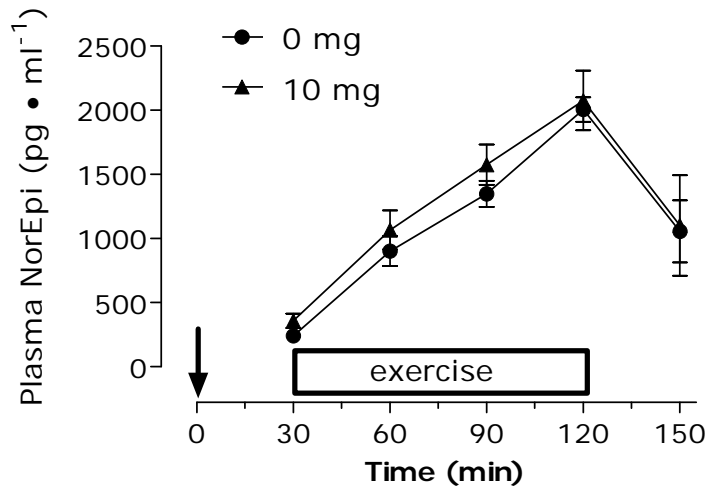**5c**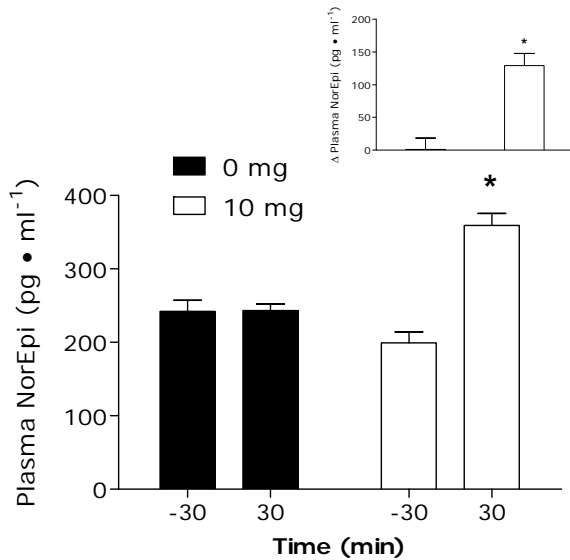

Supplement: MOESM5 [file 25655740]
